# Supplementary material
Source: PubMed Central journal article supplement (PMC3896184)
Supplement: 1314569111_pnas.201314569SI.pdf [file 1314569111_pnas.201314569SI.pdf]

# Supporting Information

Randall et al. 10.1073/pnas.1314569111

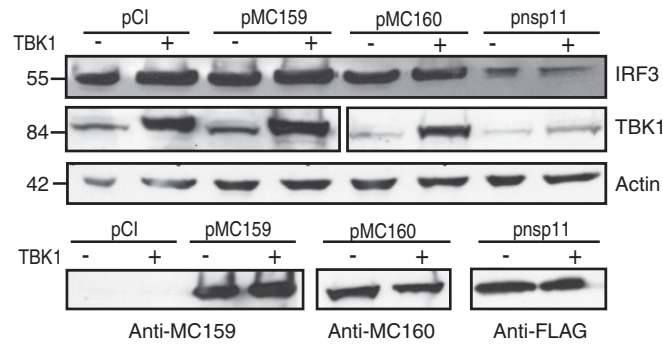

**Fig. S1.** MCV FLIP proteins do not alter IRF-3 protein levels. The 293T cells were cotransfected with 500 ng pCI or TBK-1 and 500 ng of pCI, pMC159, pMC160, or pnsP11. At 24 h posttransfection, cells were harvested and lysed in cytoplasmic extraction buffer as described previously (1). Next, 20  $\mu$ g clarified lysate from each sample were analyzed by SDS-10% PAGE and gels were run in duplicate. Proteins were transferred to PVDF membranes and membranes were probed with the following antibodies: mouse monoclonal IFN receptor 3, rabbit monoclonal Tank-binding kinase 1 (Cell Signaling), polyclonal rabbit anti-actin (Calbiochem), rabbit polyclonal MC159 (2), rabbit polyclonal MC160 (2), or mouse monoclonal anti-FLAG antibody (Sigma-Aldrich).

1. Oie KL, Pickup DJ (2001) Cowpox virus and other members of the orthopoxvirus genus interfere with the regulation of NF-kappaB activation. *Virology* 288(1):175-187.
2. Shisler JL, Moss B (2001) Molluscum contagiosum virus inhibitors of apoptosis: The MC159 v-FLIP protein blocks Fas-induced activation of procaspases and Degradation of the related MC160 protein. *Virology* 282(1):14-25.
